# Supplementary material for: Developmental profile of Filipino children born during the SARS-COV-2 pandemic: pilot study
Source: Frontiers journal article supplement (doi:10.3389/fpubh.2024.1426409), 2024-10-16
Supplement: Data_Sheet_2.PDF [file Data_Sheet_2.PDF]

Supplement Table 1: Scaled scores **per domain** on the ECCD Checklist

| Scaled Score |               | Interpretation                                             |
|--------------|---------------|------------------------------------------------------------|
| 1 - 3        | Below Average | Development in the domain must be monitored after 3 months |
| 4 - 6        |               | Development in the domain must be monitored after 6 months |
| 7 - 13       | Average       | Average development                                        |
| 14 - 16      | Above Average | Suggests slightly advanced development in the domain       |
| 17 - 19      |               | Suggests highly advanced development in the domain         |

| Gross Motor Domain (Scaled Score)                          | n        | Percentage        |
|------------------------------------------------------------|----------|-------------------|
| Development in the domain must be monitored after 3 months | 1        | .86%              |
| Development in the domain must be monitored after 6 months | 1        | .86%              |
| Average development                                        | 95       | 81.90%            |
| Suggests slightly advanced development in the domain       | 19       | 16.38%            |
|                                                            |          |                   |
| <b>Fine Motor Domain (Scaled Score)</b>                    |          |                   |
| Development in the domain must be monitored after 6 months | 10       | 8.62%             |
| Average development                                        | 105      | 90.52%            |
| Suggests slightly advanced development in the domain       | 1        | .86%              |
|                                                            |          |                   |
| <b>Self-Help Domain (Scaled Score)</b>                     | <b>n</b> | <b>Percentage</b> |
| Development in the domain must be monitored after 3 months | 1        | .86%              |
| Development in the domain must be monitored after 6 months | 4        | 3.45%             |
| Average development                                        | 55       | 47.41%            |
| Suggests slightly advanced development in the domain       | 56       | 48.28%            |
|                                                            |          |                   |
| <b>Receptive Language Domain (Scaled Score)</b>            | <b>n</b> | <b>Percentage</b> |
| Development in the domain must be monitored after 3 months | 1        | .86%              |
| Development in the domain must be monitored after 6 months | 6        | 5.17%             |
| Average development                                        | 87       | 75.00%            |
| Suggests slightly advanced development in the domain       | 22       | 18.97%            |

| <b>Expressive Language Domain (Scaled Score)</b>           | <b>n</b> | <b>Percentage</b> |
|------------------------------------------------------------|----------|-------------------|
| Development in the domain must be monitored after 3 months | 1        | .86%              |
| Development in the domain must be monitored after 6 months | 16       | 13.79%            |
| Average development                                        | 94       | 81.03%            |
| Suggests slightly advanced development in the domain       | 3        | 2.59%             |
| Suggests highly advanced development in the domain         | 2        | 1.72%             |
|                                                            |          |                   |
| <b>Cognitive Domain (Scaled Score)</b>                     | <b>n</b> | <b>Percentage</b> |
| Development in the domain must be monitored after 6 months | 3        | 2.59%             |
| Average development                                        | 95       | 81.90%            |
| Suggests slightly advanced development in the domain       | 18       | 15.52%            |
|                                                            |          |                   |
| <b>Social Emotional Domain (Scaled Score)</b>              | <b>n</b> | <b>Percentage</b> |
| Development in the domain must be monitored after 3 months | 9        | 7.76%             |
| Development in the domain must be monitored after 6 months | 9        | 7.76%             |
| Average development                                        | 97       | 83.62%            |
| Suggests slightly advanced development in the domain       | 1        | 0.86%             |

Supplement Table 2: Standard Scores for **Overall Development** on the ECCD Checklist

| <b>Standard Score</b> |               | <b>Interpretation</b>                                |
|-----------------------|---------------|------------------------------------------------------|
| 69 and below          | Below average | Overall development must be monitored after 3 months |
| 70 - 79               |               | Overall development must be monitored after 6 months |
| 80 - 119              | Average       | Average overall development                          |
| 120 - 129             | Above Average | Slightly advanced overall development                |
| 130 and above         |               | Highly advanced overall development                  |

| <b>Overall Scores (Standard Score)</b>               | <b>n</b> | <b>Percentage</b> |
|------------------------------------------------------|----------|-------------------|
| Overall development must be monitored after 3 months | 1        | 0.86%             |
| Overall development must be monitored after 6 months | 6        | 5.17%             |
| Average overall development                          | 88       | 75.86%            |
| Suggests slightly advanced overall development       | 21       | 18.10%            |

Supplement Table 3. ANOVA (categorical variables) and univariate analysis of **demographic variables** (continuous variables) **to Overall Development** using Standard Scores

| <b>Categorical Variables</b>      | <b>n</b> | <b>Mean of standard scores</b> | <b>Std Dev</b> | <b>p -value</b> |
|-----------------------------------|----------|--------------------------------|----------------|-----------------|
| <b>Sex</b>                        |          |                                |                |                 |
| Male                              | 55       | 101.18                         | 14.83          | < .001          |
| Female                            | 61       | 111.23                         | 9.95           |                 |
| <b>Mother's Education</b>         |          |                                |                |                 |
| Some elementary education or less | 2        | 72.50                          | 6.36           | < .001          |
| Elementary school graduate        | 19       | 103.58                         | 13.86          |                 |
| High school graduate or higher    | 95       | 107.76                         | 12.47          |                 |
|                                   |          |                                |                |                 |
| <b>Father's Education</b>         |          |                                |                |                 |
| Some elementary education or less | 3        | 93.67                          | 23.46          | .12             |
| Elementary school graduate        | 21       | 104.29                         | 13.18          |                 |
| High school graduate              | 68       | 106.10                         | 12.49          |                 |
| Vocational school                 | 9        | 106.67                         | 14.90          |                 |
| College graduate or higher        | 14       | 113.57                         | 14.08          |                 |
|                                   |          |                                |                |                 |
| <b>Continuous Variables</b>       | <b>n</b> | <b>Coeff (β)</b>               | <b>SE</b>      | <b>p -value</b> |
| <b>Mother's Age</b>               | 116      | -.13                           | .23            | .58             |
| <b>Father's Age</b>               | 115      | -.18                           | .18            | .32             |
| <b>Child's Age</b>                | 116      | 1.49                           | .66            | .03             |

|                                    |     |      |     |      |
|------------------------------------|-----|------|-----|------|
| <b>Number of Siblings</b>          | 116 | -.19 | .91 | .84  |
| <b>Number of Household Members</b> | 115 | .86  | .42 | .045 |
| <b>Hours of Physical Activity</b>  | 116 | .24  | .39 | .54  |
| <b>Hours of Sleep</b>              | 116 | .13  | .63 | .84  |

Supplement Table 4. ANOVA (categorical variables) and univariate analysis of **demographic variables** (continuous variables) **per domain** using Scaled Scores

| <b>GROSS MOTOR</b>                |                  |                              |                |
|-----------------------------------|------------------|------------------------------|----------------|
|                                   | <b>Mean (SD)</b> | <b>Statistic</b>             | <b>p-value</b> |
| <b>Sex</b>                        |                  |                              |                |
| Male                              | 11.20 (2.34)     | t = -.37, df = 113           | .71            |
| Female                            | 11.36 (2.30)     |                              |                |
| <b>Mother's Education</b>         |                  |                              |                |
| Some elementary education or less | 9.00 (0)         | F = 1.23, df = 2, 113        | .30            |
| Elementary school graduate        | 11.00 (2.11)     |                              |                |
| High school graduate or higher    | 11.39 (2.35)     |                              |                |
| <b>Father's Education</b>         |                  |                              |                |
| Some elementary education or less | 11.00 (2.00)     | F = 1.97, df = 4, 110        | .10            |
| Elementary school graduate        | 11.29 (2.22)     |                              |                |
| High school graduate              | 10.93 (2.24)     |                              |                |
| Vocational school                 | 11.89 (2.26)     |                              |                |
| College graduate or higher        | 12.71 (2.58)     |                              |                |
|                                   |                  |                              |                |
|                                   | $\square$ (CI)   | <b>Statistic</b>             | <b>p-value</b> |
| <b>Mother's Age</b>               | .03 (-.05, .11)  | t-score = .78, df = 1, 114   | .44            |
| <b>Father's Age</b>               | .02 (-.04, .08)  | t-score = .58, df = 1, 113   | .56            |
| <b>Child's Age (in months)</b>    | .19 (-.03, .42)  | t-score = 1.69, df = 1, 114  | .09            |
| <b>Number of Siblings</b>         | -.21 (-.51, .10) | t-score = -1.33, df = 1, 114 | .19            |

|                                              |                   |                              |                |
|----------------------------------------------|-------------------|------------------------------|----------------|
| <b>Number of Household Members</b>           | .02 (-.13, .16)   | t-score = .22, df = 1, 113   | .83            |
| <b>Hours of physical activity (in a day)</b> | .07 (-.06, 2.03)  | t-score = 1.05, df = 1, 114  | .29            |
| <b>Hours of sleep (in a day)</b>             | -.05 (-.26, .17)  | t-score = -.43, df = 1, 114  | .67            |
|                                              |                   |                              |                |
| <b>FINE MOTOR</b>                            |                   |                              |                |
|                                              | <b>Mean (SD)</b>  | <b>Statistic</b>             | <b>p-value</b> |
| <b>Sex</b>                                   |                   |                              |                |
| Male                                         | 10.24 (2.32)      | t = -2.20, df = 114          | .03            |
| Female                                       | 11.08 (1.82)      |                              |                |
| <b>Mother's Education</b>                    |                   |                              |                |
| Some elementary education or less            | 9.50 (4.95)       | F = .34, df = 2, 113         | .72            |
| Elementary school graduate                   | 10.79 (2.25)      |                              |                |
| High school graduate or higher               | 10.68 (2.04)      |                              |                |
| <b>Father's Education</b>                    |                   |                              |                |
| Some elementary education or less            | 9.33 (2.89)       | F = 2.22, df = 4, 110        | .07            |
| Elementary school graduate                   | 11.00 (1.73)      |                              |                |
| High school graduate                         | 10.41 (2.17)      |                              |                |
| Vocational school                            | 10.33 (2.60)      |                              |                |
| College graduate or higher                   | 12.00 (1.41)      |                              |                |
|                                              |                   |                              |                |
|                                              | $\square$ (CI)    | <b>Statistic</b>             | <b>p-value</b> |
| <b>Mother's Age</b>                          | -.10 (-.17, -.03) | t-score = -2.78, df = 1, 114 | .01            |
| <b>Father's Age</b>                          | -.06 (-.11, -.01) | t-score = -2.17, df = 1, 113 | .03            |
| <b>Child's Age (in months)</b>               | .08 (-.13, .29)   | t-score = .75, df = 1, 114   | .46            |
| <b>Number of Siblings</b>                    | -.02 (-.30, .26)  | t-score = -.14, df = 1, 114  | .89            |
| <b>Number of Household Members</b>           | .12 (-.01, .25)   | t-score = 1.79, df = 1, 113  | .08            |

|                                              |                  |                              |                |
|----------------------------------------------|------------------|------------------------------|----------------|
| Hours of physical activity (in a day)        | -.06 (-.18, .06) | t-score = -1.00, df = 1, 114 | .32            |
| Hours of sleep (in a day)                    | .03 (-.17, .23)  | t-score = .31, df = 1, 114   | .76            |
|                                              |                  |                              |                |
| <b>SELF HELP</b>                             |                  |                              |                |
|                                              | <b>Mean (SD)</b> | <b>Statistic</b>             | <b>p-value</b> |
| <b>Sex</b>                                   |                  |                              |                |
| Male                                         | 11.56 (2.42)     | t = -2.16, df = 114          | .03            |
| Female                                       | 12.51 (2.30)     |                              |                |
| <b>Mother's Education</b>                    |                  |                              |                |
| Some elementary education or less            | 8.00 (4.24)      | F = 3.15, df = 2, 113        | .05            |
| Elementary school graduate                   | 11.89 (1.97)     |                              |                |
| High school graduate or higher               | 12.18 (2.39)     |                              |                |
| <b>Father's Education</b>                    |                  |                              |                |
| Some elementary education or less            | 9.00 (3.46)      | F = 2.31, df = 4, 110        | .06            |
| Elementary school graduate                   | 12.29 (2.03)     |                              |                |
| High school graduate                         | 11.82 (2.42)     |                              |                |
| Vocational school                            | 12.44 (3.13)     |                              |                |
| College graduate or higher                   | 13.14 (1.41)     |                              |                |
|                                              |                  |                              |                |
|                                              | $\square$ (CI)   | <b>Statistic</b>             | <b>p-value</b> |
| <b>Mother's Age</b>                          | -.03 (-.11, .05) | t-score = -0.73, df = 1, 114 | .47            |
| <b>Father's Age</b>                          | -.04 (-.10, .03) | t-score = -1.11, df = 1, 113 | .27            |
| <b>Child's Age (in months)</b>               | .05 (-.19, .29)  | t-score = .39, df = 1, 114   | .70            |
| <b>Number of Siblings</b>                    | .05 (-.27, .37)  | t-score = .33, df = 1, 114   | .74            |
| <b>Number of Household Members</b>           | .16 (.01, .31)   | t-score = 2.15, df = 1, 113  | .03            |
| <b>Hours of physical activity (in a day)</b> | .03 (-.11, .16)  | t-score = .37, df = 1, 114   | .71            |

|                                          |                  |                              |         |
|------------------------------------------|------------------|------------------------------|---------|
| Hours of sleep (in a day)                | -.14 (-.36, .08) | t-score = -1.24, df = 1, 114 | .22     |
|                                          |                  |                              |         |
| RECEPTIVE LANGUAGE                       |                  |                              |         |
|                                          | Mean (SD)        | Statistic                    | p-value |
| Sex                                      |                  |                              |         |
| Male                                     | 10.87 (2.91)     | t = -3.36, df = 114          | .001    |
| Female                                   | 12.41 (1.97)     |                              |         |
| Mother's Education                       |                  |                              |         |
| Some elementary education<br>or less     | 5.00 (1.41)      | F = 8.47, df = 2, 113        | < .001  |
| Elementary school graduate               | 11.21 (2.53)     |                              |         |
| High school graduate or<br>higher        | 11.92 (2.40)     |                              |         |
| Father's Education                       |                  |                              |         |
| Some elementary education<br>or less     | 10.67 (4.51)     | F = 1.47, df = 4, 110        | .21     |
| Elementary school graduate               | 10.86 (2.73)     |                              |         |
| High school graduate                     | 11.81 (2.39)     |                              |         |
| Vocational school                        | 11.11 (2.93)     |                              |         |
| College graduate or higher               | 12.79 (2.42)     |                              |         |
|                                          |                  |                              |         |
|                                          | □ (CI)           | Statistic                    | p-value |
| Mother's Age                             | .06 (-.03, .14)  | t-score = 1.30, df = 1, 114  | .20     |
| Father's Age                             | .02 (-.05, .09)  | t-score = .63, df = 1, 113   | .53     |
| Child's Age (in months)                  | .29 (.04, .54)   | t-score = 2.28, df = 1, 114  | .03     |
| Number of Siblings                       | -.03 (-.38, .31) | t-score = -.19, df = 1, 114  | .85     |
| Number of Household<br>Members           | .11 (-.06, .27)  | t-score = 1.28, df = 1, 113  | .20     |
| Hours of physical activity (in a<br>day) | .07 (-.08, .21)  | t-score = .89, df = 1, 114   | .38     |
| Hours of sleep (in a day)                | .11 (-.13, .35)  | t-score = .91, df = 1, 114   | .37     |
|                                          |                  |                              |         |

|                                                  |                   |                                       |                       |
|--------------------------------------------------|-------------------|---------------------------------------|-----------------------|
| <b>EXPRESSIVE LANGUAGE</b>                       |                   |                                       |                       |
|                                                  | <b>Mean (SD)</b>  | <b>Statistic</b>                      | <b><i>p</i>-value</b> |
| <b>Sex</b>                                       |                   |                                       |                       |
| Male                                             | 8.84 (2.63)       | $t = -2.11, df = 114$                 | .04                   |
| Female                                           | 9.85 (2.56)       |                                       |                       |
| <b>Mother's Education</b>                        |                   |                                       |                       |
| Some elementary education<br>or less             | 6.00 (1.41)       | $F = 1.74, df = 2, 113$               | .18                   |
| Elementary school graduate                       | 9.26 (2.16)       |                                       |                       |
| High school graduate or<br>higher                | 9.46 (2.70)       |                                       |                       |
| <b>Father's Education</b>                        |                   |                                       |                       |
| Some elementary education<br>or less             | 9.33 (2.52)       | $F = .70, df = 4, 110$                | .60                   |
| Elementary school graduate                       | 9.38 (3.32)       |                                       |                       |
| High school graduate                             | 9.26 (2.56)       |                                       |                       |
| Vocational school                                | 8.78 (2.11)       |                                       |                       |
| College graduate or higher                       | 10.43 (2.21)      |                                       |                       |
|                                                  |                   |                                       |                       |
|                                                  | $\square$ (CI)    | <b>Statistic</b>                      | <b><i>p</i>-value</b> |
| <b>Mother's Age</b>                              | -.06 (-.14, .03)  | $t\text{-score} = -1.24, df = 1, 114$ | .22                   |
| <b>Father's Age</b>                              | -.07 (-.14, -.01) | $t\text{-score} = -2.16, df = 1, 113$ | .03                   |
| <b>Child's Age (in months)</b>                   | .33 (.08, .59)    | $t\text{-score} = 2.58, df = 1, 114$  | .01                   |
| <b>Number of Siblings</b>                        | -.28 (-.63, .07)  | $t\text{-score} = -1.60, df = 1, 114$ | .11                   |
| <b>Number of Household<br/>Members</b>           | .09 (-.07, .26)   | $t\text{-score} = 1.09, df = 1, 113$  | .28                   |
| <b>Hours of physical activity (in a<br/>day)</b> | .003 (-.15, .15)  | $t\text{-score} = .03, df = 1, 114$   | .97                   |
| <b>Hours of sleep (in a day)</b>                 | .10 (-.14, .35)   | $t\text{-score} = .84, df = 1, 114$   | .40                   |
|                                                  |                   |                                       |                       |
| <b>COGNITIVE</b>                                 |                   |                                       |                       |
|                                                  | <b>Mean (SD)</b>  | <b>Statistic</b>                      | <b><i>p</i>-value</b> |

|                                                  |                  |                             |                |
|--------------------------------------------------|------------------|-----------------------------|----------------|
| <b>Sex</b>                                       |                  |                             |                |
| Male                                             | 11.22 (2.22)     | t = -3.07, df = 114         | .003           |
| Female                                           | 12.30 (1.53)     |                             |                |
| <b>Mother's Education</b>                        |                  |                             |                |
| Some elementary education<br>or less             | 7.50 (3.54)      | F = 10.49, df = 2, 113      | < .001         |
| Elementary school graduate                       | 10.68 (2.71)     |                             |                |
| High school graduate or<br>higher                | 12.09 (1.55)     |                             |                |
| <b>Father's Education</b>                        |                  |                             |                |
| Some elementary education<br>or less             | 11.00 (1.73)     | F = 3.03, df = 4, 110       | .02            |
| Elementary school graduate                       | 10.57 (2.68)     |                             |                |
| High school graduate                             | 11.97 (1.70)     |                             |                |
| Vocational school                                | 12.11 (1.69)     |                             |                |
| College graduate or higher                       | 12.50 (1.40)     |                             |                |
|                                                  |                  |                             |                |
|                                                  | □ (CI)           | <b>Statistic</b>            | <b>p-value</b> |
| <b>Mother's Age</b>                              | .01 (-.06, .07)  | t-score = .21, df = 1, 114  | .84            |
| <b>Father's Age</b>                              | .004 (-.05, .06) | t-score .14, df = 1, 113    | .89            |
| <b>Child's Age (in months)</b>                   | -.02 (-.21, .18) | t-score = -.19, df = 1, 114 | .85            |
| <b>Number of Siblings</b>                        | .09 (-.17, .36)  | t-score = .71, df = 1, 114  | .48            |
| <b>Number of Household<br/>Members</b>           | .05 (-.07, .18)  | t-score = .86, df = 1, 113  | .39            |
| <b>Hours of physical activity (in a<br/>day)</b> | -.02 (-.13, .10) | t-score = -.31, df = 1, 114 | .76            |
| <b>Hours of sleep (in a day)</b>                 | .03 (-.15, .21)  | t-score = .35, df = 1, 114  | .72            |
|                                                  |                  |                             |                |
| <b>SOCIAL-EMOTIONAL</b>                          |                  |                             |                |
|                                                  | <b>Mean (SD)</b> | <b>Statistic</b>            | <b>p-value</b> |
| <b>Sex</b>                                       |                  |                             |                |
| Male                                             | 8.24 (3.50)      | t = -4.05, df = 114         | < .001         |

|                                              |                  |                              |                       |
|----------------------------------------------|------------------|------------------------------|-----------------------|
| Female                                       | 10.48 (2.41)     |                              |                       |
| <b>Mother's Education</b>                    |                  |                              |                       |
| Some elementary education or less            | 3.50 (2.12)      | F = 4.50, df = 2, 113        | .01                   |
| Elementary school graduate                   | 8.74 (3.54)      |                              |                       |
| High school graduate or higher               | 9.67 (2.99)      |                              |                       |
| <b>Father's Education</b>                    |                  |                              |                       |
| Some elementary education or less            | 5.33 (5.77)      | F = 1.74, df = 4, 110        | .15                   |
| Elementary school graduate                   | 9.00 (3.13)      |                              |                       |
| High school graduate                         | 9.46 (3.10)      |                              |                       |
| Vocational school                            | 9.56 (3.57)      |                              |                       |
| College graduate or higher                   | 10.43 (2.31)     |                              |                       |
|                                              |                  |                              |                       |
|                                              | $\beta$ (CI)     | <b>Statistic</b>             | <b><i>p</i>-value</b> |
| <b>Mother's Age</b>                          | -.05 (-.15, .06) | t-score = -.85, df = 1, 114  | .40                   |
| <b>Father's Age</b>                          | -.05 (-.13, .04) | t-score = -1.13, df = 1, 113 | .26                   |
| <b>Child's Age (in months)</b>               | .33 (.02, .64)   | t-score = 2.08, df = 1, 114  | .04                   |
| <b>Number of Siblings</b>                    | .14 (-.28, .57)  | t-score = .68, df = 1, 114   | .50                   |
| <b>Number of Household Members</b>           | .15 (-.05, .35)  | t-score = 1.47, df = 1, 113  | .14                   |
| <b>Hours of physical activity (in a day)</b> | .19 (.01, .37)   | t-score = 2.14, df = 1, 114  | .04                   |
| <b>Hours of sleep (in a day)</b>             | -.01 (-.30, .29) | t-score = -.06, df = 1, 114  | .96                   |
